# Supplementary material for: Orthognathic speech pathology: impacts of Class III malocclusion on speech
Source: PubMed Central journal article supplement (PMC9127721; doi:10.1093/ejo/cjab067), 2021-09-25
Supplement: cjab067_suppl_supplementary_material.pdf [file cjab067_suppl_supplementary_material.pdf]

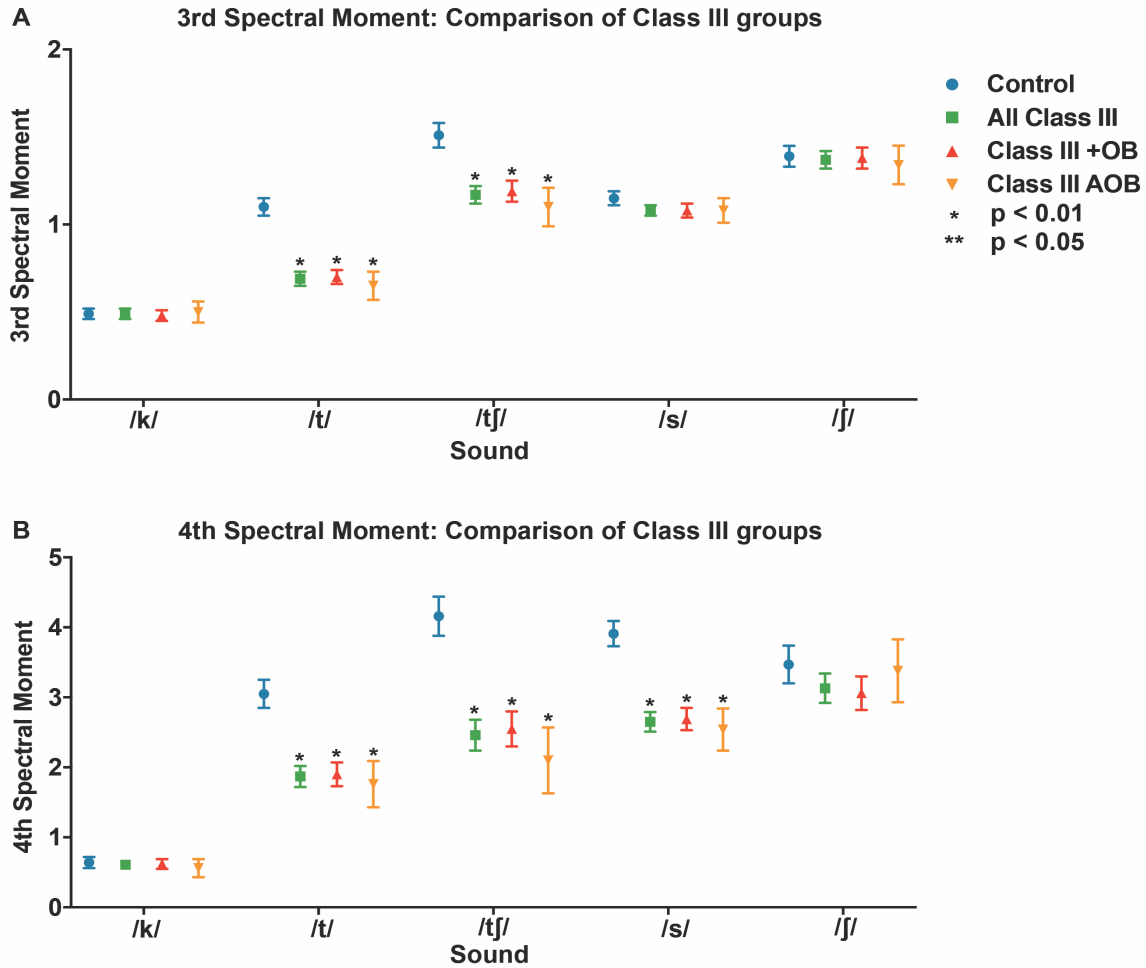

**Supplemental Figure 1:** 3rd and 4th Spectral Moments for patients with Class III DFD and Class I controls. [A.] 3rd spectral moment (M3, skew = symmetry or degree of distortion of curve) by phone. [B.] 4th spectral moment (M4, kurtosis = tails distribution, measure of outliers). Blue circle: Control. Green square: All Class III DFD patients. Red triangle: Class III DFD patients with positive (+) overbite. Orange upside down triangle: Class III DFD patients with an anterior open bite (AOB) or negative overbite. Bars represent standard deviation. Conventions: \*  $p < 0.01$  significant by Bonferonni adjustment. \*\*  $p < 0.05$ . ^individual comparison has significance but no type III group significance ( $p > 0.05$ ). ^^ type III significance  $0.01 < p < 0.05$ . Data are represented in Tables S4-S13.

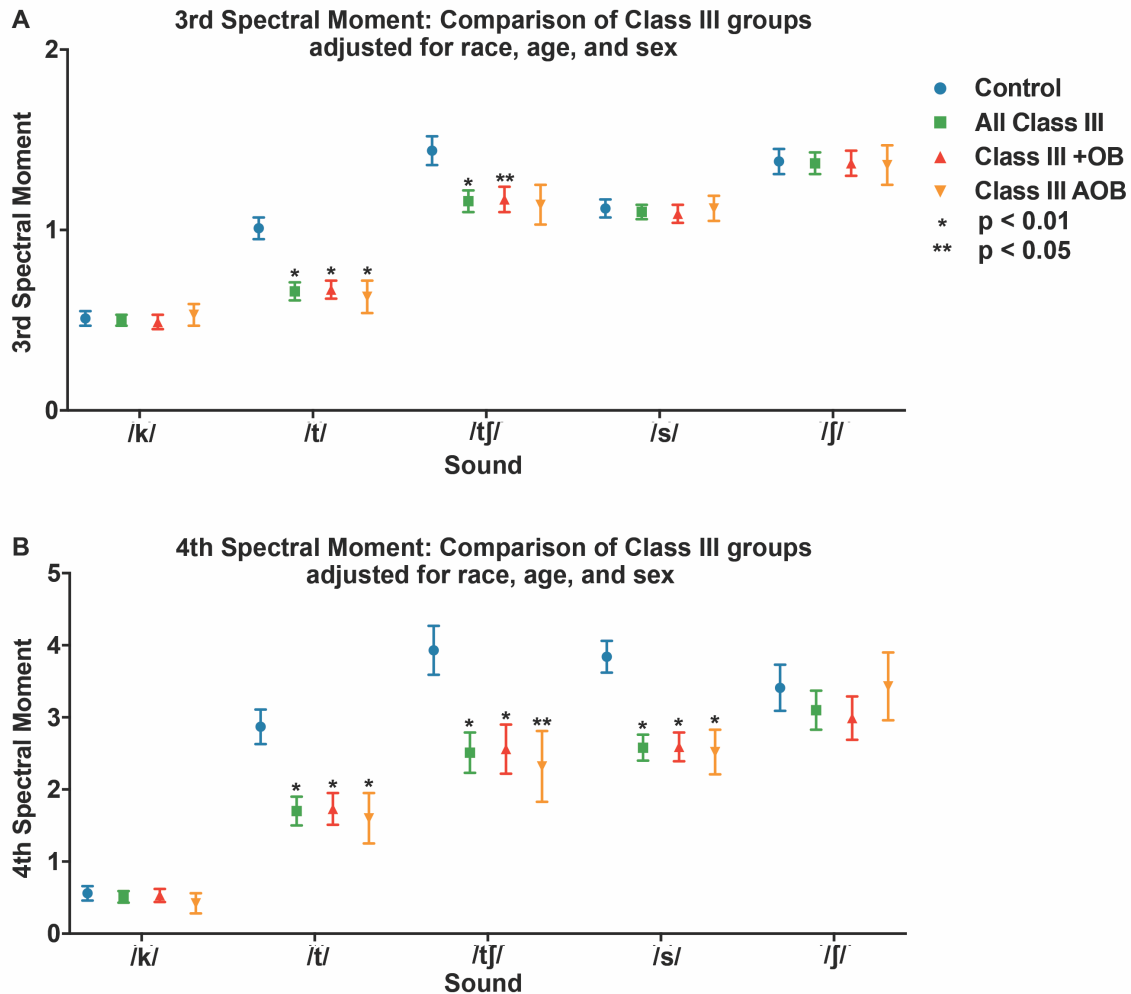

**Supplemental Figure 2:** 3rd and 4th Spectral Moments for patients with Class III DFD and control patients, adjusted for race, sex and age. [A.] 3rd spectral moment (M3, skew = symmetry or degree of distortion of curve) by phone. [B.] 4th spectral moment (M4, kurtosis = tails distribution, measure of outliers). Blue circle: Control. Green square: All Class III DFD patients. Red triangle: Class III DFD patients with positive (+) overbite. Orange upside down triangle: Class III DFD patients with an anterior open bite (AOB) or negative overbite. Bars represent standard error. Conventions: \* p < 0.01 significant by Bonferonni adjustment. \*\* p < 0.05. ^ individual comparison has significance but no type III group significance (p > 0.05). ^^ type III significance 0.01 < p < 0.05. Data are represented in Tables S4-S13.

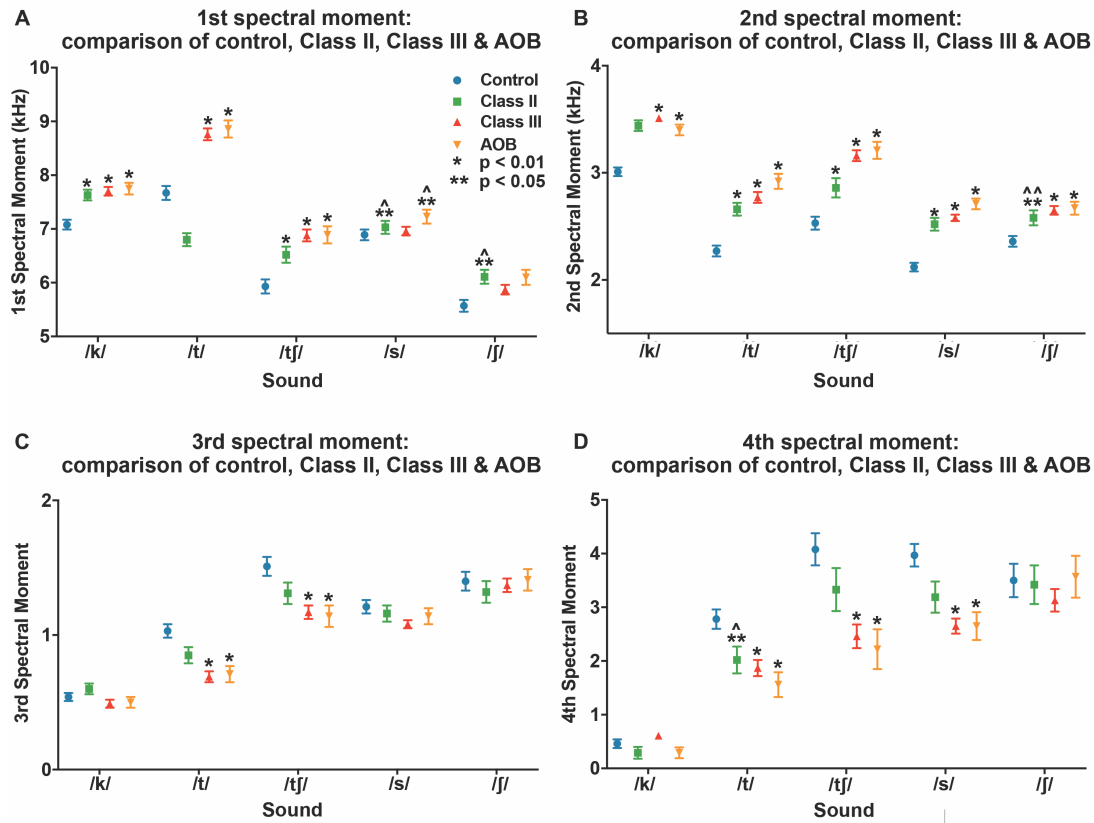

**Supplemental Figure 3:** 1st - 4th Spectral Moments for Patients with Class II, III and AOB DFD and Class I Control patients. [A.] 1st Spectral Moment / Mean Frequency (M1) by phone. [B.] 2<sup>nd</sup> spectral moment (M2, standard deviation = spectral spread) by phone. [C.] 3rd spectral moment (M3, skew = symmetry or degree of distortion of curve) by phone. [D.] 4th spectral moment (M4, kurtosis = tails distribution, measure of outliers). Blue circle: Control. Green square: All Class II DFD patients. Red triangle: All Class III DFD patients. Orange upside down triangle: All anterior open bite (AOB) patients. Bars represent standard error. Conventions: \*  $p < 0.01$  significant by Bonferonni adjustment. \*\*  $p < 0.05$ . ^ individual comparison has significance but no type III group significance ( $p > 0.05$ ). ^^ type III significance  $0.01 < p < 0.05$ . Data are represented in Tables S4-S13 and in (29,30).

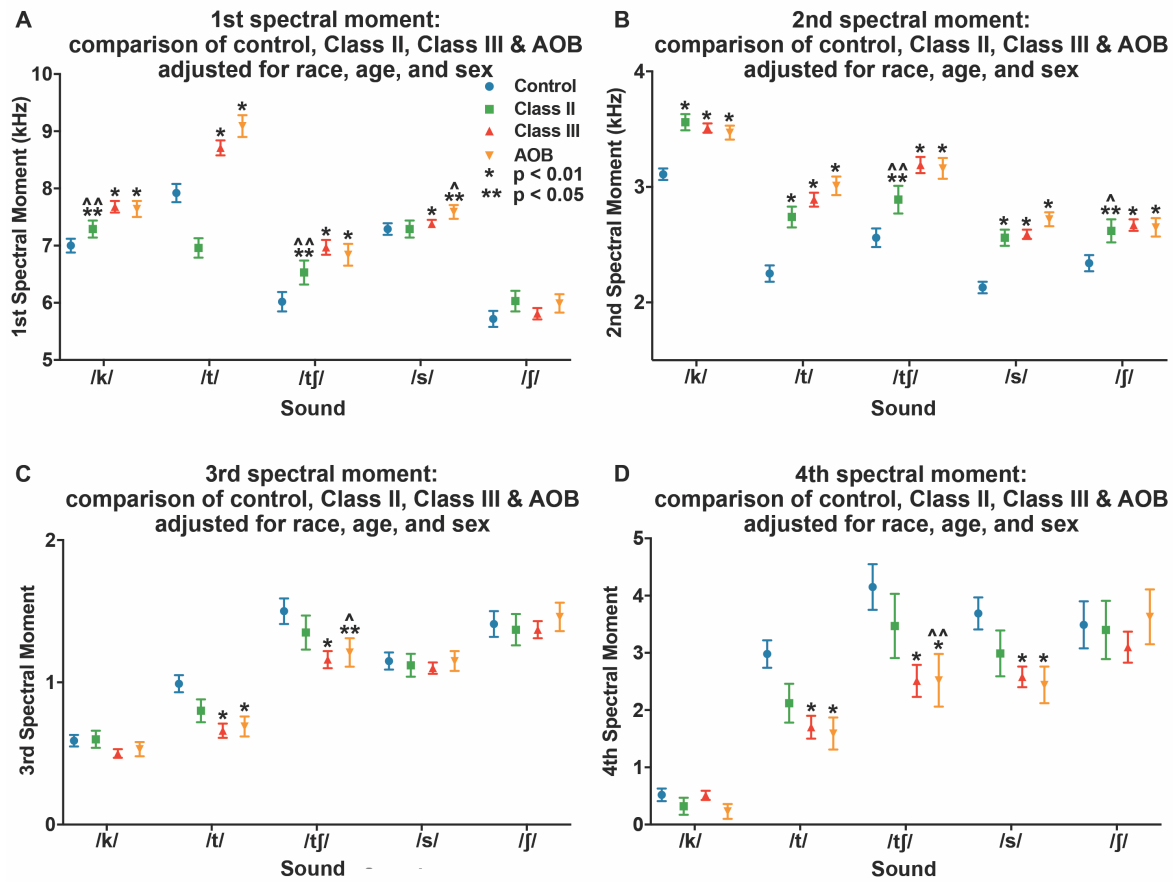

**Supplemental Figure 4:** 1st - 4th Spectral Moments for Patients with Class II, III and AOB DFD and Class I Control patients, adjusted for race, age and sex. [A.] 1st Spectral Moment / Mean Frequency (M1) by phone. [B.] 2<sup>nd</sup> spectral moment (M2, standard deviation = spectral spread) by phone. [C.] 3rd spectral moment (M3, skew = symmetry or degree of distortion of curve) by phone. [D.] 4th spectral moment (M4, kurtosis = tails distribution, measure of outliers). Blue circle: Control. Green square: All Class II DFD patients. Red triangle: All Class III DFD patients. Orange upside down triangle: All anterior open bite (AOB) patients. Bars represent standard error. Conventions: \* p<0.01 significant by Bonferonni adjustment. \*\* p<0.05. ^individual comparison has significance but no type III group significance (p>0.05). ^^ type III significance 0.01<p<0.05. Data are represented in Tables S4-S13 and in (29, 30).

**Supplemental Table 1:** Type and Prevalence of Distortions by Speech-Language Pathologist Perceptual Evaluation

| Sound     | Class III DFD Dental (n=102) | Control Dental (n=62) | Class III DFD Interdental (n=102) | Control Interdental (n=62) | Audio DFD (n=102) | Audio Control (n=62) |
|-----------|------------------------------|-----------------------|-----------------------------------|----------------------------|-------------------|----------------------|
| /sa/      | 63.73% (n=65)                | 1.61% (n=1)           | 3.92% (n=4)                       | 0.00% (n=0)                | 66.67% (n=68)     | 1.61% (n=1)          |
| /si/**    | 61.11% (n=11)                | 2.50% (n=1)           | 11.11% (n=2)                      | 0.00% (n=0)                | 50.00% (n=9)      | 2.50% (n=1)          |
| /sissy/** | 55.56% (n=10)                | 2.50% (n=1)           | 11.11% (n=2)                      | 0.00% (n=0)                | 50.00% (n=9)      | 2.50% (n=1)          |
| /ta/      | 38.24% (n=39)                | 0.00% (n=0)           | 0.98% (n=1)                       | 0.00% (n=0)                | 36.27% (n=37)     | 0.00% (n=0)          |
| /ti/**    | 27.78% (n=5)                 | 2.50% (n=1))          | 0.00% (n=0)                       | 0.00% (n=0)                | 11.11% (n=2)      | 2.50% (n=1)          |
| /la/      | 35.29% (n=36)                | 3.22% (n=2)           | 13.73% (n=14)                     | 0.00% (n=0)                | 37.25% (n=38)     | 3.22% (n=2)          |

\*\*For /si/, /sissy/, and /ti/, n=18 for Class III subjects and n=40 for controls. These sound were added to the evaluation partway through the study so we do not have data on all Class III and control subjects for these sounds.

**Supplemental Table 2:** Word List for Speech Evaluations

| Word  | Vowel | Sound |
|-------|-------|-------|
| Chap  | /a/   | /Ch/  |
| Cheap | /i/   | /Ch/  |
| Chew  | /u/   | /Ch/  |
| Chop  | /a/   | /Ch/  |
| Cap   | /ae/  | /K/   |
| Coo   | /u/   | /K/   |
| Cop   | /a/   | /K/   |
| Key   | /i/   | /K/   |
| Sack  | /ae/  | /S/   |
| See   | /i/   | /S/   |
| Sock  | /a/   | /S/   |
| Sue   | /u/   | /S/   |
| Shack | /ae/  | /Sh/  |
| She   | /i/   | /Sh/  |
| Shock | /a/   | /Sh/  |
| Shoe  | /u/   | /Sh/  |
| Tap   | /ae/  | /T/   |
| Tea   | /i/   | /T/   |
| Too   | /u/   | /T/   |
| Top   | /a/   | /T/   |

**Supplemental Table 3:** Intra-examiner Cephalometric Concordance Correlations

| Class III | ANB   | IMPA  | Wits  | FMA   | SN-GoGn | U1-SN (degrees) | U1-NA (degrees) | U1-NA (mm) |
|-----------|-------|-------|-------|-------|---------|-----------------|-----------------|------------|
| Lower CL  | 0.973 | 0.934 | 0.971 | 0.961 | 0.959   | 0.912           | 0.926           | 0.955      |
| ConcCorr  | 0.989 | 0.971 | 0.987 | 0.983 | 0.982   | 0.962           | 0.968           | 0.981      |
| Upper CL  | 0.995 | 0.988 | 0.994 | 0.993 | 0.992   | 0.983           | 0.986           | 0.992      |

**Supplemental Table 4:** Unadjusted and Adjusted Data for Class III DFD and Controls for phoneme /k/

| Group                              | Variable      | Unadjusted Mean (SE) | Unadjusted p-value^^ | Adjusted Mean (SE)^ | Adjusted p-value^,^^ |
|------------------------------------|---------------|----------------------|----------------------|---------------------|----------------------|
| Control N=62<br>(2448 Words)       | M1 Mean (kHz) | 7.27 (0.10)          | Ref                  | 7.22 (0.12)         | Ref                  |
|                                    | M2 SD (kHz)   | 3.27 (0.04)          | Ref                  | 3.24 (0.05)         | Ref                  |
|                                    | M3 Skew       | 0.49 (0.03)          | Ref                  | 0.51 (0.04)         | Ref                  |
|                                    | M4 Kurtosis   | 0.64 (0.08)          | Ref                  | 0.56 (0.10)         | Ref                  |
| Class III<br>N=102<br>(1488 Words) | M1 Mean (kHz) | 7.70 (0.08)          | 0.0006*              | 7.68 (0.10)         | 0.0005*              |
|                                    | M2 SD (kHz)   | 3.51 (0.03)          | <0.0001*             | 3.51 (0.04)         | <0.0001*             |
|                                    | M3 Skew       | 0.49 (0.03)          | 0.86                 | 0.50 (0.03)         | 0.78                 |
|                                    | M4 Kurtosis   | 0.61 (0.06)          | 0.71                 | 0.51 (0.08)         | 0.62                 |

\*Significant by Bonferroni adjustment ( $p < 0.01$ )

\*\*Significant by convention ( $0.01 < p < 0.05$ )

^Adjusted by Race, Sex and Age

^^Pairwise comparison with a Tukey-Kramer adjustment p-values were calculated using a mixed model comparing the DFD group with controls as reference, adjusting for age, race, and gender in adjusted groups. Controls have no p-values because they are the reference group for all other adjusted calculations.

N = number of patients in each group



**Supplemental Table 5:** Unadjusted and Adjusted Data for Class III DFD Subgroups and Controls for /k/

| Group                                    | Variable      | Unadjusted Mean (SE) | Unadjusted Type III p-value <sup>^^</sup> | Unadjusted Pairwise p-value <sup>^^</sup> | Adjusted Mean (SE) <sup>^</sup> | Adjusted Type III p-value <sup>^, ^^</sup> | Adjusted Pairwise p-value <sup>^, ^^</sup> |
|------------------------------------------|---------------|----------------------|-------------------------------------------|-------------------------------------------|---------------------------------|--------------------------------------------|--------------------------------------------|
| Control N=62<br>(1488 Words)             | M1 Mean (kHz) | 7.27 (0.10)          | 0.003*                                    | Ref                                       | 7.22 (0.12)                     | 0.002*                                     | Ref                                        |
|                                          | M2 SD (kHz)   | 3.25 (0.04)          | <.0001*                                   | Ref                                       | 3.21 (0.05)                     | <0.0001*                                   | Ref                                        |
|                                          | M3 Skew       | 0.49 (0.03)          | 0.96                                      | Ref                                       | 0.51 (0.04)                     | 0.81                                       | Ref                                        |
|                                          | M4 Kurtosis   | 0.64 (0.08)          | 0.85                                      | Ref                                       | 0.56 (0.10)                     | 0.68                                       | Ref                                        |
|                                          |               |                      |                                           |                                           |                                 |                                            |                                            |
| Class III AOB<br>N=22<br>(528 Words)     | M1 Mean (kHz) | 7.73 (0.17)          |                                           | 0.04**                                    | 7.65 (0.18)                     |                                            | 0.08                                       |
|                                          | M2 SD (kHz)   | 3.57 (0.07)          |                                           | 0.0005*                                   | 3.60 (0.07)                     |                                            | <0.0001*                                   |
|                                          | M3 Skew       | 0.50 (0.06)          |                                           | 1.00                                      | 0.53 (0.06)                     |                                            | 0.96                                       |
|                                          | M4 Kurtosis   | 0.56 (0.13)          |                                           | 0.84                                      | 0.42 (0.14)                     |                                            | 0.65                                       |
|                                          |               |                      |                                           |                                           |                                 |                                            |                                            |
| Class III No<br>AOB N=80<br>(1920 Words) | M1 Mean (kHz) | 7.69 (0.09)          |                                           | 0.004*                                    | 7.70 (0.11)                     |                                            | 0.002*                                     |
|                                          | M2 SD (kHz)   | 3.47 (0.04)          |                                           | 0.0005*                                   | 3.45 (0.05)                     |                                            | 0.0001*                                    |
|                                          | M3 Skew       | 0.48 (0.03)          |                                           | 0.97                                      | 0.49 (0.04)                     |                                            | 0.90                                       |
|                                          | M4 Kurtosis   | 0.62 (0.07)          |                                           | 0.97                                      | 0.53 (0.09)                     |                                            | 0.96                                       |
|                                          |               |                      |                                           |                                           |                                 |                                            |                                            |

\*Significant by Bonferroni adjustment (p<0.01)

\*\*Significant by convention (0.01<p<0.05)

<sup>^</sup>Adjusted by Race, Sex and Age

<sup>^^</sup>Pairwise with a Tukey-Kramer adjustment and Type III p-values were calculated using a mixed model comparing the DFD group with controls as reference, adjusting for age, race, and gender in adjusted groups. The Type III p-value indicates a significant difference overall between groups. Controls have no p-values because they are the reference group for all other adjusted calculations.

N = number of patients in each group

**Supplemental Table 6:** Unadjusted and Adjusted Data for Class III DFD and Controls for /t/

| Group                           | Variable      | Unadjusted Mean (SE) | Unadjusted p-value^^ | Adjusted Mean (SE)^ | Adjusted p-value^,^^ |
|---------------------------------|---------------|----------------------|----------------------|---------------------|----------------------|
| Control N=62<br>(744 Words)     | M1 Mean (kHz) | 7.56 (0.14)          | Ref                  | 7.71 (0.16)         | Ref                  |
|                                 | M2 SD (kHz)   | 2.18 (0.06)          | Ref                  | 2.28 (0.07)         | Ref                  |
|                                 | M3 Skew       | 1.10 (0.05)          | Ref                  | 1.01 (0.06)         | Ref                  |
|                                 | M4 Kurtosis   | 3.05 (0.20)          | Ref                  | 2.87 (0.24)         | Ref                  |
| Class III N=102<br>(1224 Words) | M1 Mean (kHz) | 8.76 (0.11)          | <0.0001*             | 8.71 (0.13)         | <0.0001*             |
|                                 | M2 SD (kHz)   | 2.77 (0.05)          | <0.0001*             | 2.89 (0.06)         | <0.0001*             |
|                                 | M3 Skew       | 0.69 (0.04)          | <0.0001*             | 0.66 (0.05)         | <0.0001*             |
|                                 | M4 Kurtosis   | 1.87 (0.15)          | <0.0001*             | 1.70 (0.20)         | <0.0001*             |

\*Significant by Bonferroni adjustment ( $p < 0.01$ )

\*\*Significant by convention ( $0.01 < p < 0.05$ )

^Adjusted by Race, Sex and Age

^^Pairwise comparison with a Tukey-Kramer adjustment p-values were calculated using a mixed model comparing the DFD group with controls as reference, adjusting for age, race, and gender in adjusted groups. Controls have no p-values because they are the reference group for all other adjusted calculations.

N = number of patients in each group

**Supplemental Table 7:** Unadjusted and Adjusted Data for Class III DFD Subgroups and Controls for /t/

| Group                                   | Variable      | Unadjusted Mean (SE) | Unadjusted Type III p-value <sup>^^</sup> | Unadjusted Pairwise p-value <sup>^^</sup> | Adjusted Mean (SE) <sup>^</sup> | Adjusted Type III p-value <sup>^,^^</sup> | Adjusted Pairwise p-value <sup>^,^^</sup> |
|-----------------------------------------|---------------|----------------------|-------------------------------------------|-------------------------------------------|---------------------------------|-------------------------------------------|-------------------------------------------|
| Control N=62<br>(744 Words)             | M1 Mean (kHz) | 7.58 (0.14)          | <0.0001*                                  | Ref                                       | 7.71 (0.16)                     | <0.0001*                                  | Ref                                       |
|                                         | M2 SD (kHz)   | 2.19 (0.06)          | <0.0001*                                  | Ref                                       | 2.28 (0.07)                     | <0.0001*                                  | Ref                                       |
|                                         | M3 Skew       | 1.10 (0.05)          | <0.0001*                                  | Ref                                       | 1.01 (0.06)                     | <0.0001*                                  | Ref                                       |
|                                         | M4 Kurtosis   | 3.05 (0.20)          | <0.0001*                                  | Ref                                       | 2.87 (0.24)                     | <0.0001*                                  | Ref                                       |
|                                         |               |                      |                                           |                                           |                                 |                                           |                                           |
| Class III AOB<br>N=22<br>(264 Words)    | M1 Mean (kHz) | 9.10 (0.24)          |                                           | <0.0001*                                  | 8.93 (0.23)                     |                                           | <0.0001*                                  |
|                                         | M2 SD (kHz)   | 2.76 (0.10)          |                                           | <0.0001*                                  | 2.90 (0.10)                     |                                           | <0.0001*                                  |
|                                         | M3 Skew       | 0.65 (0.08)          |                                           | <0.0001*                                  | 0.63 (0.09)                     |                                           | 0.0005*                                   |
|                                         | M4 Kurtosis   | 1.76 (0.33)          |                                           | 0.003*                                    | 1.60 (0.35)                     |                                           | 0.004*                                    |
|                                         |               |                      |                                           |                                           |                                 |                                           |                                           |
| Class III No<br>AOB N=80<br>(960 Words) | M1 Mean (kHz) | 8.69 (0.12)          |                                           | <0.0001*                                  | 8.65 (0.15)                     |                                           | <0.0001*                                  |
|                                         | M2 SD (kHz)   | 2.77 (0.06)          |                                           | <0.0001*                                  | 2.88 (0.07)                     |                                           | <0.0001*                                  |
|                                         | M3 Skew       | 0.70 (0.04)          |                                           | <0.0001*                                  | 0.67 (0.05)                     |                                           | <0.0001*                                  |
|                                         | M4 Kurtosis   | 1.90 (0.17)          |                                           | <0.0001*                                  | 1.73 (0.22)                     |                                           | 0.0001*                                   |
|                                         |               |                      |                                           |                                           |                                 |                                           |                                           |

\*Significant by Bonferroni adjustment (p<0.01)

\*\*Significant by convention (0.01<p<0.05)

<sup>^</sup>Adjusted by Race, Sex and Age

<sup>^^</sup>Pairwise with a Tukey-Kramer adjustment and Type III p-values were calculated using a mixed model comparing the DFD group with controls as reference, adjusting for age, race, and gender in adjusted groups. The Type III p-value indicates a significant difference overall between groups. Controls have no p-values because they are the reference group for all other adjusted calculations.

N = number of patients in each group

**Supplemental Table 8:** Unadjusted and Adjusted Data for Class III DFD and Controls for /ch/

| Group                           | Variable      | Unadjusted Mean (SE) | Unadjusted p-value^^ | Adjusted Mean (SE)^ | Adjusted p-value^,^^ |
|---------------------------------|---------------|----------------------|----------------------|---------------------|----------------------|
| Control N=62<br>(744 Words)     | M1 Mean (kHz) | 5.93 (0.14)          | Ref                  | 6.13 (0.16)         | Ref                  |
|                                 | M2 SD (kHz)   | 2.53 (0.07)          | Ref                  | 2.64 (0.08)         | Ref                  |
|                                 | M3 Skew       | 1.51 (0.07)          | Ref                  | 1.44 (0.08)         | Ref                  |
|                                 | M4 Kurtosis   | 4.16 (0.28)          | Ref                  | 3.93 (0.34)         | Ref                  |
| Class III N=102<br>(1224 Words) | M1 Mean (kHz) | 6.88 (0.11)          | <0.0001*             | 6.97 (0.13)         | <0.0001*             |
|                                 | M2 SD (kHz)   | 3.16 (0.05)          | <0.0001*             | 3.19 (0.07)         | <0.0001*             |
|                                 | M3 Skew       | 1.17 (0.05)          | <0.0001*             | 1.16 (0.06)         | 0.002*               |
|                                 | M4 Kurtosis   | 2.46 (0.22)          | <0.0001*             | 2.51 (0.28)         | 0.0002*              |

\*Significant by Bonferroni adjustment ( $p < 0.01$ )

\*\*Significant by convention ( $0.01 < p < 0.05$ )

^Adjusted by Race, Sex and Age

^^Pairwise comparison with a Tukey-Kramer adjustment p-values were calculated using a mixed model comparing the DFD group with controls as reference, adjusting for age, race, and gender in adjusted groups. Controls have no p-values because they are the reference group for all other adjusted calculations.

N = number of patients in each group

**Supplemental Table 9:** Unadjusted and Adjusted Data for Class III DFD Subgroups and Controls for /ch/

| Group                                   | Variable      | Unadjusted Mean (SE) | Unadjusted Type III p-value <sup>^^</sup> | Unadjusted Pairwise p-value <sup>^^</sup> | Adjusted Mean (SE) <sup>^</sup> | Adjusted Type III p-value <sup>^, ^^</sup> | Adjusted Pairwise p-value <sup>^, ^^</sup> |
|-----------------------------------------|---------------|----------------------|-------------------------------------------|-------------------------------------------|---------------------------------|--------------------------------------------|--------------------------------------------|
| Control N=62<br>(744 Words)             | M1 Mean (kHz) | 5.93 (0.14)          | <0.0001*                                  | Ref                                       | 6.13 (0.16)                     | <0.0001*                                   | Ref                                        |
|                                         | M2 SD (kHz)   | 2.53 (0.07)          | <0.0001*                                  | Ref                                       | 2.63 (0.08)                     | <0.0001*                                   | Ref                                        |
|                                         | M3 Skew       | 1.51 (0.07)          | 0.0001*                                   | Ref                                       | 1.44 (0.08)                     | 0.007*                                     | Ref                                        |
|                                         | M4 Kurtosis   | 4.16 (0.28)          | <0.0001*                                  | Ref                                       | 3.94 (0.34)                     | 0.0007*                                    | Ref                                        |
| Class III AOB<br>N=22<br>(264 Words)    | M1 Mean (kHz) | 6.98 (0.23)          |                                           | 0.0003*                                   | 6.94 (0.23)                     |                                            | 0.007*                                     |
|                                         | M2 SD (kHz)   | 3.25 (0.11)          |                                           | <0.0001*                                  | 3.28 (0.11)                     |                                            | <0.0001*                                   |
|                                         | M3 Skew       | 1.10 (0.11)          |                                           | 0.004*                                    | 1.14 (0.11)                     |                                            | 0.060                                      |
|                                         | M4 Kurtosis   | 2.10 (0.47)          |                                           | 0.0006*                                   | 2.32 (0.49)                     |                                            | 0.010*                                     |
| Class III No AOB<br>N=80<br>(960 Words) | M1 Mean (kHz) | 6.86 (0.12)          |                                           | <0.0001*                                  | 6.98 (0.15)                     |                                            | <0.0001*                                   |
|                                         | M2 SD (kHz)   | 3.14 (0.06)          |                                           | <0.0001*                                  | 3.16 (0.07)                     |                                            | <0.0001*                                   |
|                                         | M3 Skew       | 1.19 (0.06)          |                                           | 0.0006*                                   | 1.17 (0.07)                     |                                            | 0.010**                                    |
|                                         | M4 Kurtosis   | 2.55 (0.25)          |                                           | <0.0001*                                  | 2.56 (0.34)                     |                                            | 0.001*                                     |

\*Significant by Bonferroni adjustment ( $p < 0.01$ )

\*\*Significant by convention ( $0.01 < p < 0.05$ )

<sup>^</sup>Adjusted by Race, Sex and Age

<sup>^^</sup>Pairwise with a Tukey-Kramer adjustment and Type III p-values were calculated using a mixed model comparing the DFD group with controls as reference, adjusting for age, race, and gender in adjusted groups. The Type III p-value indicates a significant difference overall between groups. Controls have no p-values because they are the reference group for all other adjusted calculations.

N = number of patients in each group

**Supplemental Table 10:** Unadjusted and Adjusted Data for Class III DFD and Controls for /s/

| Group                              | Variable      | Unadjusted Mean (SE) | Unadjusted p-value <sup>^^</sup> | Adjusted Mean (SE) <sup>^</sup> | Adjusted p-value <sup>^,^^</sup> |
|------------------------------------|---------------|----------------------|----------------------------------|---------------------------------|----------------------------------|
| Control N=62<br>(1488 Words)       | M1 Mean (kHz) | 6.76 (0.10)          | Ref                              | 7.08 (0.09)                     | Ref                              |
|                                    | M2 SD (kHz)   | 2.12 (0.04)          | Ref                              | 2.12 (0.05)                     | Ref                              |
|                                    | M3 Skew       | 1.15 (0.04)          | Ref                              | 1.12 (0.05)                     | Ref                              |
|                                    | M4 Kurtosis   | 3.91 (0.18)          | Ref                              | 3.84 (0.22)                     | Ref                              |
| Class III<br>N=102<br>(2448 Words) | M1 Mean (kHz) | 6.96 (0.08)          | 0.10                             | 7.38 (0.07)                     | 0.003*                           |
|                                    | M2 SD (kHz)   | 2.58 (0.03)          | <0.0001*                         | 2.59 (0.04)                     | <0.0001*                         |
|                                    | M3 Skew       | 1.08 (0.03)          | 0.19                             | 1.10 (0.04)                     | 0.73                             |
|                                    | M4 Kurtosis   | 2.65 (0.14)          | <0.0001*                         | 2.58 (0.18)                     | <0.0001*                         |

\*Significant by Bonferroni adjustment ( $p < 0.01$ )

\*\*Significant by convention ( $0.01 < p < 0.05$ )

<sup>^</sup>Adjusted by Race, Sex and Age

<sup>^^</sup>Pairwise comparison with a Tukey-Kramer adjustment p-values were calculated using a mixed model comparing the DFD group with controls as reference, adjusting for age, race, and gender in adjusted groups. Controls have no p-values because they are the reference group for all other adjusted calculations.

N = number of patients in each group

**Supplemental Table 11:** Unadjusted and Adjusted Data for Class III DFD Subgroups and Controls for /s/

| Group                                     | Variable      | Unadjusted Mean (SE) | Unadjusted Type III p-value^^ | Unadjusted Pairwise p-value^^ | Adjusted Mean (SE)^ | Adjusted Type III p-value^,^^ | Adjusted Pairwise p-value^,^^ |
|-------------------------------------------|---------------|----------------------|-------------------------------|-------------------------------|---------------------|-------------------------------|-------------------------------|
| Control N=62<br>(1488 Words)              | M1 Mean (kHz) | 6.75 (0.10)          | 0.24                          | Ref                           | 7.12 (0.09)         | 0.003*                        | Ref                           |
|                                           | M2 SD (kHz)   | 2.12 (0.04)          | <0.0001*                      | Ref                           | 2.12 (0.05)         | <0.0001*                      | Ref                           |
|                                           | M3 Skew       | 1.15 (0.04)          | 0.42                          | Ref                           | 1.11 (0.05)         | 0.84                          | Ref                           |
|                                           | M4 Kurtosis   | 3.91 (0.18)          | <0.0001*                      | Ref                           | 3.85 (0.22)         | <0.0001*                      | Ref                           |
| Class III AOB<br>N=22<br>(528 Words)      | M1 Mean (kHz) | 7.01 (0.16)          |                               | 0.33                          | 7.28 (0.13)         |                               | 0.51                          |
|                                           | M2 SD (kHz)   | 2.67 (0.07)          |                               | <0.0001*                      | 2.67 (0.07)         |                               | <0.0001*                      |
|                                           | M3 Skew       | 1.08 (0.07)          |                               | 0.69                          | 1.12 (0.07)         |                               | 0.99                          |
|                                           | M4 Kurtosis   | 2.54 (0.30)          |                               | 0.0003*                       | 2.52 (0.31)         |                               | 0.0007*                       |
| Class III No<br>AOB N=1920<br>(684 Words) | M1 Mean (kHz) | 6.93 (0.09)          |                               | 0.34                          | 7.47 (0.08)         |                               | 0.002*                        |
|                                           | M2 SD (kHz)   | 2.57 (0.04)          |                               | <0.0001*                      | 2.56 (0.05)         |                               | <0.0001*                      |
|                                           | M3 Skew       | 1.08 (0.04)          |                               | 0.42                          | 1.09 (0.05)         |                               | 0.89                          |
|                                           | M4 Kurtosis   | 2.69 (0.16)          |                               | <0.0001*                      | 2.59 (0.20)         |                               | <0.0001*                      |

\*Significant by Bonferroni adjustment (p<0.01)

\*\*Significant by convention (0.01<p<0.05)

^Adjusted by Race, Sex and Age

^^Pairwise with a Tukey-Kramer adjustment and Type III p-values were calculated using a mixed model comparing the DFD group with controls as reference, adjusting for age, race, and gender in adjusted groups. The Type III p-value indicates a significant difference overall between groups.

Controls have no p-values because they are the reference group for all other adjusted calculations.

N = number of patients in each group

**Supplemental Table 12:** Unadjusted and Adjusted Data for Class III DFD and Controls for /sh/

| Group                           | Variable      | Unadjusted Mean (SE) | Unadjusted p-value^^ | Adjusted Mean (SE)^ | Adjusted p-value^,^^ |
|---------------------------------|---------------|----------------------|----------------------|---------------------|----------------------|
| Control N=62<br>(744 Words)     | M1 Mean (kHz) | 5.73 (0.11)          | Ref                  | 5.64 (0.13)         | Ref                  |
|                                 | M2 SD (kHz)   | 2.37 (0.05)          | Ref                  | 2.37 (0.06)         | Ref                  |
|                                 | M3 Skew       | 1.39 (0.06)          | Ref                  | 1.38 (0.07)         | Ref                  |
|                                 | M4 Kurtosis   | 3.47 (0.27)          | Ref                  | 3.41 (0.32)         | Ref                  |
| Class III N=102<br>(1224 Words) | M1 Mean (kHz) | 5.87 (0.09)          | 0.36                 | 5.81 (0.10)         | 0.21                 |
|                                 | M2 SD (kHz)   | 2.65 (0.04)          | <0.0001*             | 2.67 (0.05)         | <0.0001*             |
|                                 | M3 Skew       | 1.37 (0.05)          | 0.85                 | 1.37 (0.06)         | 0.91                 |
|                                 | M4 Kurtosis   | 3.13 (0.21)          | 0.32                 | 3.10 (0.27)         | 0.38                 |

\*Significant by Bonferroni adjustment ( $p < 0.01$ )

\*\*Significant by convention ( $0.01 < p < 0.05$ )

^Adjusted by Race, Sex and Age

^^Pairwise comparison with a Tukey-Kramer adjustment p-values were calculated using a mixed model comparing the DFD group with controls as reference, adjusting for age, race, and gender in adjusted groups. Controls have no p-values because they are the reference group for all other adjusted calculations.

N = number of patients in each group



**Supplemental Table 13:** Unadjusted and Adjusted Data for Class III DFD Subgroups and Controls for /sh

| Group                                   | Variable      | Unadjusted Mean (SE) | Unadjusted Type III p-value^^ | Unadjusted Pairwise p-value^^ | Adjusted Mean (SE)^ | Adjusted Type III p-value^,^^ | Adjusted Pairwise p-value^,^^ |
|-----------------------------------------|---------------|----------------------|-------------------------------|-------------------------------|---------------------|-------------------------------|-------------------------------|
| Control N=62<br>(744 Words)             | M1 Mean (kHz) | 5.74 (0.11)          | 0.26                          | Ref                           | 5.63 (0.13)         | 0.34                          | Ref                           |
|                                         | M2 SD (kHz)   | 2.37 (0.05)          | <0.0001*                      | Ref                           | 2.37 (0.06)         | <0.0001*                      | Ref                           |
|                                         | M3 Skew       | 1.39 (0.06)          | 0.93                          | Ref                           | 1.38 (0.08)         | 0.99                          | Ref                           |
|                                         | M4 Kurtosis   | 3.47 (0.27)          | 0.50                          | Ref                           | 3.40 (0.32)         | 0.47                          | Ref                           |
| Class III AOB<br>N=22<br>(264 Words)    | M1 Mean (kHz) | 6.10 (0.19)          |                               | 0.24                          | 5.93 (0.18)         |                               | 0.33                          |
|                                         | M2 SD (kHz)   | 2.66 (0.08)          |                               | 0.009*                        | 2.68 (0.09)         |                               | 0.007*                        |
|                                         | M3 Skew       | 1.34 (0.11)          |                               | 0.92                          | 1.36 (0.11)         |                               | 0.99                          |
|                                         | M4 Kurtosis   | 3.38 (0.45)          |                               | 0.98                          | 3.43 (0.47)         |                               | 1.00                          |
| Class III No AOB<br>N=80<br>(960 Words) | M1 Mean (kHz) | 5.80 (0.10)          |                               | 0.91                          | 5.77 (0.12)         |                               | 0.60                          |
|                                         | M2 SD (kHz)   | 2.65 (0.04)          |                               | 0.0001*                       | 2.66 (0.06)         |                               | 0.0002*                       |
|                                         | M3 Skew       | 1.38 (0.06)          |                               | 1.00                          | 1.37 (0.07)         |                               | 1.00                          |
|                                         | M4 Kurtosis   | 3.06 (0.24)          |                               | 0.48                          | 2.99 (0.30)         |                               | 0.51                          |

\*Significant by Bonferroni adjustment ( $p < 0.01$ )

\*\*Significant by convention ( $0.01 < p < 0.05$ )

^Adjusted by Race, Sex and Age

^^Pairwise with a Tukey-Kramer adjustment and Type III p-values were calculated using a mixed model comparing the DFD group with controls as reference, adjusting for age, race, and gender in adjusted groups. The Type III p-value indicates a significant difference overall between groups. Controls have no p-values because they are the reference group for all other adjusted calculations.

N = number of patients in each group

**Supplemental Table 14:** Adjusted regression data for spectral moments as a function of ANB<sup>o\*</sup>

| <b>Group</b> | <b>Variable</b> | <b>Y-intercept</b> | <b>Std Error</b> | <b>Beta</b> | <b>Std Error</b> | <b>p-value<sup>^</sup></b> |
|--------------|-----------------|--------------------|------------------|-------------|------------------|----------------------------|
| <b>/k/</b>   | M1 Mean (kHz)   | 7.4422             | 0.3841           | 0.000069    | .0141            | 0.9961                     |
|              | M2 SD (kHz)     | 3.6593             | 0.1563           | 0.00274     | 0.005738         | 0.6331                     |
|              | M3 Skew         | 0.5669             | 0.1291           | 0.004982    | 0.004738         | 0.2931                     |
|              | M4 Kurtosis     | 0.4168             | 0.3033           | -0.00065    | 0.01113          | 0.9534                     |
| <b>/t/</b>   | M1 Mean         | 8.6465             | 0.483            | -0.0373     | 0.01773          | 0.0356 <sup>^^</sup>       |
|              | M2 SD           | 2.9115             | 0.2334           | 0.01809     | 0.008569         | 0.0349 <sup>^^</sup>       |
|              | M3 Skew         | 0.5132             | 0.1639           | 0.003932    | 0.006018         | 0.5137                     |
|              | M4 Kurtosis     | 1.3722             | 0.6211           | -0.02727    | 0.0228           | 0.2318                     |
| <b>/ch/</b>  | M1 Mean         | 6.7989             | 0.5101           | -0.00049    | 0.01872          | 0.9791                     |
|              | M2 SD           | 3.1171             | 0.2345           | -0.00953    | 0.008609         | 0.2687                     |
|              | M3 Skew         | 1.1263             | 0.229            | 0.008925    | 0.008405         | 0.2885                     |
|              | M4 Kurtosis     | 3.0534             | 0.9092           | 0.0423      | 0.03338          | 0.2053                     |
| <b>/s/</b>   | M1 Mean         | 7.0426             | 0.3168           | 0.01854     | 0.01163          | 0.1111                     |
|              | M2 SD           | 2.481              | 0.1588           | -0.00284    | 0.005831         | 0.6264                     |
|              | M3 Skew         | 0.9921             | 0.1489           | 0.00323     | 0.005467         | 0.5546                     |
|              | M4 Kurtosis     | 3.0625             | 0.6612           | 0.04633     | 0.02427          | 0.0564                     |
| <b>/sh/</b>  | M1 Mean         | 6.2445             | 0.404            | 0.02799     | 0.01483          | 0.0594                     |
|              | M2 SD           | 2.6831             | 0.1878           | -0.0035     | 0.006895         | 0.6121                     |
|              | M3 Skew         | 0.8679             | 0.2172           | -0.00453    | 0.007972         | 0.5698                     |
|              | M4 Kurtosis     | 1.5802             | 0.9466           | 0.02892     | 0.03475          | 0.4054                     |

\*Adjusted for age, race and sex. Model includes all patients with DFD (n= 169 total; 7 AOB Class I, 10 AOB Class II, 22 AOB Class III, 28 Class II +OB, 22 Class III +OB, 80 Class III +OB) and controls (n = 62).

<sup>^</sup>p-value indicates a linear relationship between the spectral moment and ANB<sup>o</sup>

<sup>^^</sup>p-value convention (p<0.05)

**Supplemental Table 15:** Adjusted regression data for spectral moments as a function of IMPA<sup>°</sup>\*

| <b>Group</b> | <b>Variable</b> | <b>Y-intercept</b> | <b>Std Error</b> | <b>Beta</b> | <b>Std Error</b> | <b>p-value<sup>^</sup></b> |
|--------------|-----------------|--------------------|------------------|-------------|------------------|----------------------------|
| <b>/k/</b>   | M1 Mean (kHz)   | 7.3288             | 0.7163           | 0.001406    | 0.007534         | 0.8519                     |
|              | M2 SD (kHz)     | 3.726              | 0.2917           | -0.00106    | 0.003068         | 0.7289                     |
|              | M3 Skew         | 0.6177             | 0.2416           | -0.00092    | 0.002541         | 0.716                      |
|              | M4 Kurtosis     | 0.4457             | 0.5655           | -0.00032    | 0.005948         | 0.9574                     |
| <b>/t/</b>   | M1 Mean         | 9.0343             | 0.9128           | -0.00278    | 0.0096           | 0.7721                     |
|              | M2 SD           | 1.9806             | 0.4338           | 0.01044     | 0.004563         | 0.0223 <sup>^^</sup>       |
|              | M3 Skew         | 0.5428             | 0.3062           | -0.00058    | 0.00322          | 0.8587                     |
|              | M4 Kurtosis     | 3.1067             | 1.1529           | -0.01994    | 0.01213          | 0.1003                     |
| <b>/ch/</b>  | M1 Mean         | 6.5823             | 0.951            | 0.002715    | 0.01             | 0.7861                     |
|              | M2 SD           | 3.3068             | 0.439            | -0.00179    | 0.004617         | 0.6981                     |
|              | M3 Skew         | 1.1005             | 0.4287           | -0.00021    | 0.004509         | 0.9625                     |
|              | M4 Kurtosis     | 2.3159             | 1.7045           | 0.00657     | 0.01793          | 0.7141                     |
| <b>/s/</b>   | M1 Mean         | 6.4496             | 0.5937           | 0.006416    | 0.006244         | 0.3043                     |
|              | M2 SD           | 2.6459             | 0.296            | -0.00185    | 0.003113         | 0.5524                     |
|              | M3 Skew         | 0.9708             | 0.278            | 0.000064    | 0.002924         | 0.9824                     |
|              | M4 Kurtosis     | 1.3519             | 1.2374           | 0.01843     | 0.01301          | 0.1568                     |
| <b>/sh/</b>  | M1 Mean         | 5.4822             | 0.7604           | 0.00783     | 0.007997         | 0.3277                     |
|              | M2 SD           | 3.0454             | 0.3489           | -0.00426    | 0.003669         | 0.2461                     |
|              | M3 Skew         | 1.0929             | 0.405            | -0.00252    | 0.004259         | 0.5541                     |
|              | M4 Kurtosis     | -0.1792            | 1.7623           | 0.02009     | 0.01853          | 0.2787                     |

\*Adjusted for age, race and sex. Model includes all patients with DFD (n= 169 total; 7 AOB Class I, 10 AOB Class II, 22 AOB Class III, 28 Class II +OB, 22 Class III +OB, 80 Class III +OB) and controls (n = 62).

<sup>^</sup>p-value indicates a linear relationship between the spectral moment and IMPA<sup>°</sup>

<sup>^^</sup>p-value convention (p<0.05)

**Supplemental Table 16:** Adjusted regression data for spectral moments as a function of Wits (mm)\*

| Group       | Variable      | Y-intercept | Std Error | Beta     | Std Error | p-value <sup>^</sup> |
|-------------|---------------|-------------|-----------|----------|-----------|----------------------|
| <i>/k/</i>  | M1 Mean (kHz) | 7.5017      | 0.3864    | 0.007473 | 0.009755  | 0.4437               |
|             | M2 SD (kHz)   | 3.56        | 0.1569    | -0.00606 | 0.003962  | 0.1263               |
|             | M3 Skew       | 0.5454      | 0.1306    | 0.000233 | 0.003298  | 0.9438               |
|             | M4 Kurtosis   | 0.3906      | 0.3058    | -0.00323 | 0.00772   | 0.6758               |
| <i>/t/</i>  | M1 Mean       | 8.6091      | 0.4879    | -0.02539 | 0.01232   | 0.0395 <sup>^^</sup> |
|             | M2 SD         | 2.881       | 0.2376    | 0.006799 | 0.006     | 0.2574               |
|             | M3 Skew       | 0.5267      | 0.1649    | 0.004103 | 0.004163  | 0.3245               |
|             | M4 Kurtosis   | 1.3913      | 0.06274   | -0.01333 | 0.1584    | 0.4002               |
| <i>/ch/</i> | M1 Mean       | 6.7775      | 0.5139    | -0.00271 | 0.01297   | 0.8345               |
|             | M2 SD         | 3.0045      | 0.01297   | -0.01879 | 0.005786  | 0.0012 <sup>^^</sup> |
|             | M3 Skew       | 1.1265      | 0.231     | 0.004962 | 0.005833  | 0.3951               |
|             | M4 Kurtosis   | 3.2095      | 0.9103    | 0.04239  | 0.02298   | 0.0654               |
| <i>/s/</i>  | M1 Mean       | 7.0528      | 0.32      | 0.01131  | 0.008078  | 0.1616               |
|             | M2 SD         | 2.4209      | 0.1574    | -0.0096  | 0.003973  | 0.0157 <sup>^^</sup> |
|             | M3 Skew       | 0.9893      | 0.1502    | 0.001529 | 0.003791  | 0.6868               |
|             | M4 Kurtosis   | 3.1299      | 0.6671    | 0.03422  | 0.01684   | 0.0423 <sup>^^</sup> |
| <i>/sh/</i> | M1 Mean       | 6.2435      | 0.409     | 0.01536  | 0.01033   | 0.1372               |
|             | M2 SD         | 2.6364      | 0.1872    | -0.00874 | 0.004727  | 0.0648               |
|             | M3 Skew       | 0.8388      | 0.2181    | -0.00603 | 0.005508  | 0.2736               |
|             | M4 Kurtosis   | 1.5641      | 0.9549    | 0.01497  | 0.2411    | 0.5348               |

\*Adjusted for age, race and sex. Model includes all patients with DFD (n= 169 total; 7 AOB Class I, 10 AOB Class II, 22 AOB Class III, 28 Class II +OB, 22 Class III +OB, 80 Class III +OB) and controls (n = 62).

<sup>^</sup>p-value indicates a linear relationship between the spectral moment and Wits (mm).

<sup>^^</sup>p-value convention (p<0.05)

**Supplemental Table 17:** Adjusted regression data for spectral moments as a function of FMA<sup>o\*</sup>

| <b>Group</b> | <b>Variable</b> | <b>Y-intercept</b> | <b>Std Error</b> | <b>Beta</b> | <b>Std Error</b> | <b>p-value<sup>^</sup></b> |
|--------------|-----------------|--------------------|------------------|-------------|------------------|----------------------------|
| <b>/k/</b>   | M1 Mean (kHz)   | 7.30               | 0.41             | 0.0083      | 0.0099           | 0.4008                     |
|              | M2 SD (kHz)     | 3.50               | 0.1619           | 0.01        | 0.0039           | 0.0113 <sup>^^</sup>       |
|              | M3 Skew         | .4502              | 0.1356           | 0.0054      | 0.0033           | 0.0989                     |
|              | M4 Kurtosis     | 0.4525             | 0.3211           | -0.00211    | 0.00782          | 0.7872                     |
| <b>/t/</b>   | M1 Mean         | 8.8242             | 0.5185           | -0.00107    | 0.0126           | 0.9326                     |
|              | M2 SD           | 2.562              | 0.2436           | 0.01745     | 0.005931         | 0.0033 <sup>^^</sup>       |
|              | M3 Skew         | 0.5774             | 0.1731           | -0.00517    | 0.004214         | 0.2204                     |
|              | M4 Kurtosis     | 1.9857             | 0.6517           | -0.032      | 0.01587          | 0.0439                     |
| <b>/ch/</b>  | M1 Mean         | 6.507              | 0.5361           | 0.019       | 0.01305          | 0.1458                     |
|              | M2 SD           | 3.0191             | 0.2473           | 0.00946     | 0.00602          | 0.1164                     |
|              | M3 Skew         | 1.1109             | 0.2434           | -0.00178    | 0.005925         | 0.7636                     |
|              | M4 Kurtosis     | 3.1793             | 0.9654           | -0.02224    | 0.0235           | 0.3441                     |
| <b>/s/</b>   | M1 Mean         | 7.0701             | 0.3377           | -0.00614    | 0.008223         | 0.4554                     |
|              | M2 SD           | 2.3831             | 0.1673           | 0.00674     | 0.0041           | 0.0982                     |
|              | M3 Skew         | 0.8519             | 0.1553           | 0.00829     | 0.00378          | 0.0285                     |
|              | M4 Kurtosis     | 2.617              | 0.7044           | 0.0148      | 0.0172           | 0.3868                     |
| <b>/sh/</b>  | M1 Mean         | 6.0941             | 0.4333           | 0.00147     | 0.0106           | 0.8895                     |
|              | M2 SD           | 2.703              | 0.1991           | -0.0003     | 0.00485          | 0.95                       |
|              | M3 Skew         | 0.7967             | 0.2293           | 0.00616     | 0.00558          | 0.2698                     |
|              | M4 Kurtosis     | 1.0904             | 1.0014           | 0.02426     | 0.0244           | 0.3199                     |

\*Adjusted for age, race and sex. Model includes all patients with DFD (n= 169 total; 7 AOB Class I, 10 AOB Class II, 22 AOB Class III, 28 Class II +OB, 22 Class III +OB, 80 Class III +OB) and controls (n = 62).

<sup>^</sup>p-value indicates a linear relationship between the spectral moment and FMA<sup>o</sup>

<sup>^^</sup>p-value convention (p<0.05)

**Supplemental Table 18:** Adjusted regression data for spectral moments as a function of SN-GoGn<sup>o\*</sup>

| <b>Group</b> | <b>Variable</b> | <b>Y-intercept</b> | <b>Std Error</b> | <b>Beta</b> | <b>Std Error</b> | <b>p-value<sup>^</sup></b> |
|--------------|-----------------|--------------------|------------------|-------------|------------------|----------------------------|
| <b>/k/</b>   | M1 Mean (kHz)   | 7.6613             | 0.4489           | -0.00814    | 0.0093           | 0.3802                     |
|              | M2 SD (kHz)     | 3.452              | 0.1809           | 0.0075      | 0.0037           | 0.0458 <sup>^^</sup>       |
|              | M3 Skew         | 0.4067             | 0.1502           | 0.00513     | 0.0031           | 0.0986                     |
|              | M4 Kurtosis     | 0.3485             | 0.3551           | 0.0028      | 0.0073           | 0.7059                     |
| <b>/t/</b>   | M1 Mean         | 9.6586             | 0.5587           | -0.03253    | 0.01155          | 0.0049 <sup>^^</sup>       |
|              | M2 SD           | 2.7152             | 0.277            | 0.0041      | 0.00573          | 0.4696                     |
|              | M3 Skew         | 0.3954             | 0.1917           | 0.00385     | 0.003964         | 0.3312                     |
|              | M4 Kurtosis     | 1.368              | 0.731            | 0.0054      | 0.01511          | 0.7211                     |
| <b>/ch/</b>  | M1 Mean         | 6.9866             | 0.5968           | -0.00703    | 0.01234          | 0.5692                     |
|              | M2 SD           | 3.0839             | 0.2757           | 0.00299     | 0.0057           | 0.6001                     |
|              | M3 Skew         | 0.9248             | 0.2682           | 0.0060      | 0.005544         | 0.2762                     |
|              | M4 Kurtosis     | 2.5351             | 1.0702           | 0.01193     | 0.02212          | 0.5898                     |
| <b>/s/</b>   | M1 Mean         | 7.2193             | 0.3723           | -0.00942    | 0.007696         | 0.221                      |
|              | M2 SD           | 2.475              | 0.1863           | 0.0007      | 0.00385          | 0.8556                     |
|              | M3 Skew         | 0.74               | 0.1707           | 0.00905     | 0.0035           | 0.0104                     |
|              | M4 Kurtosis     | 2.0977             | 0.7725           | 0.02817     | 0.01597          | 0.0779                     |
| <b>/sh/</b>  | M1 Mean         | 6.3542             | 0.478            | -0.0089     | 0.0099           | 0.3656                     |
|              | M2 SD           | 2.7963             | 0.2197           | -0.00378    | 0.00454          | 0.4053                     |
|              | M3 Skew         | 0.6323             | 0.2515           | 0.0099      | 0.0052           | 0.0583                     |
|              | M4 Kurtosis     | 0.452              | 1.1004           | 0.039       | 0.0228           | 0.0853                     |

\*Adjusted for age, race and sex. Model includes all patients with DFD (n= 169 total; 7 AOB Class I, 10 AOB Class II, 22 AOB Class III, 28 Class II +OB, 22 Class III +OB, 80 Class III +OB) and controls (n = 62).

<sup>^</sup>p-value indicates a linear relationship between the spectral moment and SN-GoGn<sup>o\*</sup>

<sup>^^</sup>p-value convention (p<0.05)

**Supplemental Table 19:** Adjusted regression data for spectral moments, mix models for OJ\*

| Group       | Variable      | Y-intercept | Std Error | Beta     | Std Error | p-value <sup>^</sup>  |
|-------------|---------------|-------------|-----------|----------|-----------|-----------------------|
| <b>/k/</b>  | M1 Mean (kHz) | 7.0712      | 0.3423    | -0.01487 | 0.01393   | 0.286                 |
|             | M2 SD (kHz)   | 3.4361      | 0.1713    | -0.01877 | 0.0070    | 0.0072 <sup>^^</sup>  |
|             | M3 Skew       | 0.6157      | 0.1099    | -0.00162 | 0.0045    | 0.7173                |
|             | M4 Kurtosis   | 0.3474      | 0.2667    | -0.00939 | 0.0109    | 0.3872                |
| <b>/t/</b>  | M1 Mean       | 8.2978      | 0.4185    | -0.0689  | 0.01703   | <0.0001 <sup>^^</sup> |
|             | M2 SD         | 2.7876      | 0.2153    | -0.01823 | 0.0088    | 0.0377 <sup>^^</sup>  |
|             | M3 Skew       | 0.2575      | 0.1936    | 0.01365  | 0.0079    | 0.0834                |
|             | M4 Kurtosis   | 2.0805      | 0.6321    | 0.0279   | 0.02573   | 0.2793                |
| <b>/ch/</b> | M1 Mean       | 6.5532      | 0.4139    | -0.0361  | 0.01685   | 0.0326 <sup>^^</sup>  |
|             | M2 SD         | 3.1352      | 0.2101    | -0.03949 | 0.0086    | <0.0001 <sup>^^</sup> |
|             | M3 Skew       | 1.139       | 0.2006    | 0.01135  | 0.0082    | 0.1645                |
|             | M4 Kurtosis   | 2.7086      | 0.8219    | 0.0655   | 0.0335    | 0.0504                |
| <b>/s/</b>  | M1 Mean       | 6.3941      | 0.2875    | 0.0034   | 0.0117    | 0.7714                |
|             | M2 SD         | 2.5126      | 0.1532    | -0.02387 | 0.0062    | 0.0001 <sup>^^</sup>  |
|             | M3 Skew       | 0.9193      | 0.1438    | -0.00394 | 0.00585   | 0.5014                |
|             | M4 Kurtosis   | 2.3331      | 0.5697    | 0.05498  | 0.02319   | 0.0178 <sup>^</sup>   |
| <b>/sh/</b> | M1 Mean       | 5.7328      | 0.3241    | 0.01022  | 0.01319   | 0.4385                |
|             | M2 SD         | 2.5668      | 0.1679    | -0.01927 | 0.006835  | 0.0049 <sup>^^</sup>  |
|             | M3 Skew       | 1.0787      | 0.1845    | -0.00833 | 0.00751   | 0.2675                |
|             | M4 Kurtosis   | 2.0812      | 0.7834    | 0.02471  | 0.03189   | 0.4385                |

\*Adjusted for age, race and sex. Model includes all patients with DFD (n= 169 total; 7 AOB Class I, 10 AOB Class II, 22 AOB Class III, 28 Class II +OB, 22 Class III +OB, 80 Class III +OB) and controls (n = 62).

<sup>^</sup>p-value indicates a linear relationship between the spectral moment and OJ (mm).

<sup>^^</sup>p-value convention (p<0.05)
